# Supplementary material
Source: bioRxiv or medRxiv preprint supplement (https://www.biorxiv.org/highwire/filestream/35388/field_highwire_adjunct_files/0/120170-1.pdf)
Supplement: Supplementary file [file 120170-1.pdf]

**A**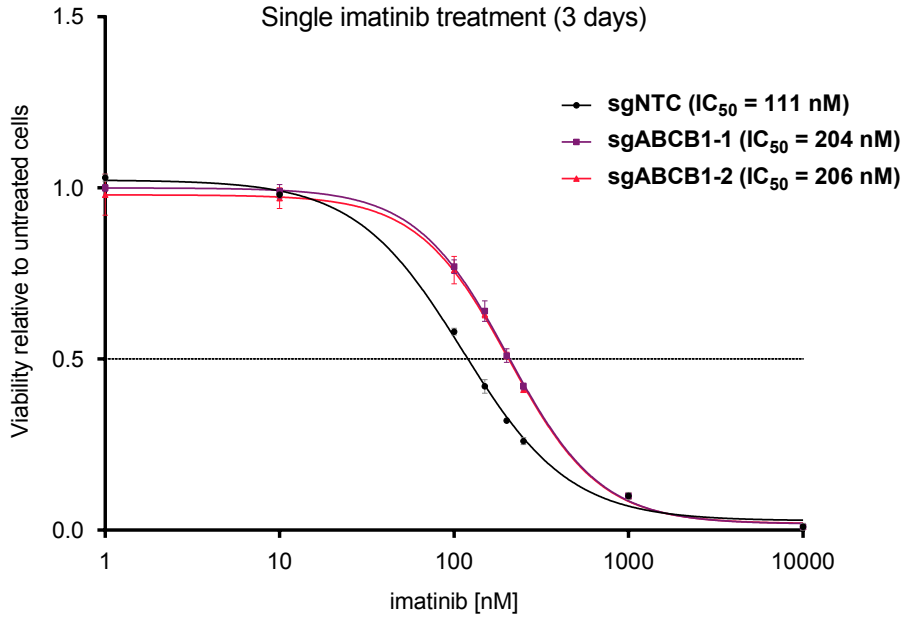**B**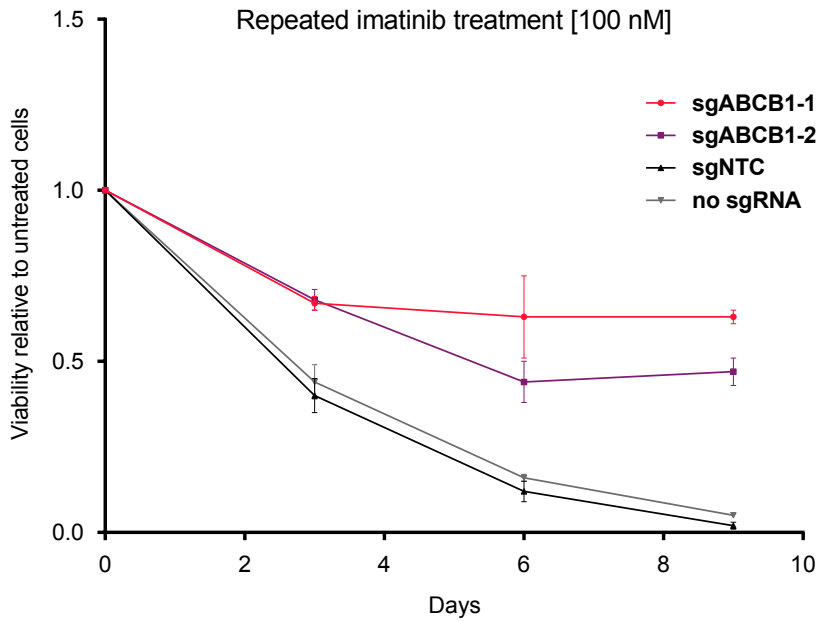

| Day | sgABCB1-1 |      |      | sgABCB1-2 |      |      | sgNTC |      | no sgRNA |      |
|-----|-----------|------|------|-----------|------|------|-------|------|----------|------|
|     | mean      | SEM  | RF   | mean      | SEM  | RF   | mean  | SEM  | mean     | SEM  |
| 3   | 0.67      | 0.02 | 1.7  | 0.68      | 0.03 | 1.7  | 0.4   | 0.05 | 0.44     | 0.05 |
| 6   | 0.63      | 0.12 | 5.3  | 0.44      | 0.06 | 3.7  | 0.12  | 0.03 | 0.16     | 0.01 |
| 9   | 0.63      | 0.02 | 31.5 | 0.47      | 0.04 | 23.5 | 0.02  | 0.01 | 0.05     | 0    |
